# Supplementary material for: Spousal concordance in pathophysiological markers and risk factors for type 2 diabetes: a cross-sectional analysis of The Maastricht Study
Source: PubMed Central journal article supplement — BMJ Open Diabetes Res Care. 2021 Feb 17;9(1):e001879. doi: 10.1136/bmjdrc-2020-001879 (PMC7893653; doi:10.1136/bmjdrc-2020-001879), 2021-02-17
Supplement: bmjdrc-2020-001879supp001.pdf [file bmjdrc-2020-001879supp001.pdf]

## Supplemental material

Table S1. General characteristics of The Maastricht Study participants with a spouse that also participated in the study and participants with a spouse that did not participated in The Maastricht Study, for men and women separately.

|                                     | Men                                  |                               | Women                              |                              |
|-------------------------------------|--------------------------------------|-------------------------------|------------------------------------|------------------------------|
|                                     | Without spouse information, n= 1,231 | Spouse information, n= 326    | Without spouse information, n= 997 | Spouse information, n= 326   |
|                                     | Median (iqr)                         |                               |                                    |                              |
| <b>Socio-demographics</b>           |                                      |                               |                                    |                              |
| Age                                 | 62.0 (56.0-66.0)                     | 62.0 (56.2-66.0)              | 59.0 (52.0-65.0)                   | 59.0 (53.0-64.0)             |
| <b>Risk factors</b>                 |                                      |                               |                                    |                              |
| <b>Physical activity dimensions</b> |                                      |                               |                                    |                              |
| Total wake time (minutes)           | 6,158.8<br>(5,487.8-6,660.4)         | 6,387.0<br>(5,669.8-6,705.6)* | 6,165.1<br>(5,577.7-6,591.4)       | 6,026.9<br>(5,613.6-6,662.1) |
| Mean stepping minutes/day           | 114.1<br>(83.2-145.7)                | 121.7<br>(90.5-150.5)*        | 119.0<br>(95.5-147.8)              | 124.4<br>(102.3-146.2)       |
| Time spent in HPA (%)               | 1.4 (0.7-2.7)                        | 1.5 (0.7-2.9)                 | 2.3 (1.4-3.7)                      | 2.7 (1.5-3.7)                |
| Time spent in LPA (%)               | 9.9 (7.5-12.4)                       | 10.4 (7.9-13.1)*              | 10.0 (8.1-12.0)                    | 10.4 (8.5-12.1)              |
| <b>Sedentary time (%)</b>           | 63.1 (56.3-69.8)                     | 62.9 (55.0-68.1)              | 56.8 (50.2-63.2)                   | 55.0 (49.0-61.2)*            |
| <b>Diet indicators</b>              |                                      |                               |                                    |                              |
| Dutch Healthy Diet Index            | 79.5 (69.8-88.3)                     | 79.8 (70.7-90.5)              | 87.2(77.2-97.5)                    | 89.9 (80.5-97.2)             |
| Total energy intake                 | 2,285.7<br>(1,898.2-,740.7)          | 2,361.2<br>(1,961.3-,737.4)   | 1,928.4<br>(1,608.5-,311.8)        | 1,921.8<br>(1,652.2-,293.8)  |
| <b>Adiposity measures</b>           |                                      |                               |                                    |                              |
| BMI                                 | 27.1 (25.0-29.7)                     | 26.5 (24.4-28.9)*             | 25.7 (23.0-29.3)                   | 24.8 (22.5-27.3)*            |
| Percentage of body fat              | 28.9 (25.5-32.8)                     | 27.7 (24.5-32.2)*             | 38.9 (35.2-42.1)                   | 37.9 (34.8-41.1)*            |
| Waist circumference                 | 100.5<br>(93.5-108.1)                | 99.1*<br>(92.4-107.0)         | 88.5<br>(80.8-98.0)                | 86.7<br>(80.1-94.3)*         |
| Waist to hip ratio                  | 0.99 (0.95-1.04)                     | 0.99 (0.94-1.02)*             | 0.87 (0.82-0.92)                   | 0.86 (0.83-0.91)             |
| <b>Pathophysiological markers</b>   |                                      |                               |                                    |                              |
| <b>Insulin sensitivity indices</b>  |                                      |                               |                                    |                              |
| Matsuda index                       | 2.9 (1.7-4.6)                        | 3.1 (1.9-4.7)                 | 3.9 (2.3-5.8)                      | 4.2 (2.6-5.7)                |
| HOMA2-IR                            | 1.5 (1.0-2.3)                        | 1.4 (1.0-2.1)                 | 1.2 (0.8-1.8)                      | 1.1 (0.9-1.6)                |
| <b>Beta cell function indices</b>   |                                      |                               |                                    |                              |
| C-peptidogenic index                | 292.3<br>(159.3-471.3)               | 374.1<br>(235.6-561.4)*       | 378.3<br>(243.8-606.9)             | 423.3<br>(268.3-724.9)*      |
| Glucose sensitivity index           | 21.2 (12.2-32.8)                     | 26.0 (17.8-36.9)*             | 25.6 (16.1-38.0)                   | 27.2 (18.4-38.4)             |
| C-peptide AUC                       | 173.0<br>(125.3-225.9)               | 187.5<br>(148.9-251.9)*       | 193.6<br>(144.7-239.9)             | 197.5<br>(159.8-250.8)       |
| Rate sensitivity index              | 215.7                                | 211.0                         | 215.7                              | 208.2                        |

|                                      |                  |                   |                  |                   |
|--------------------------------------|------------------|-------------------|------------------|-------------------|
|                                      | (109.2-368.1)    | (116.4-368.9)*    | (109.2-368.1)    | (125.3-383.1)     |
| Potential factor                     | 1.4 (1.1-1.8)    | 1.5 (1.1-1.9) *   | 1.5 (1.1-2.0)    | 1.6 (1.2-2.1)     |
| Disposition index                    | 0.5 (0.2-0.8)    | 0.6 (0.4-0.9)*    | 0.7 (0.4-1.1)    | 0.8 (0.5-1.1)*    |
| <b>Glucose metabolism indicators</b> |                  |                   |                  |                   |
| Fasting plasma glucose (mmol/L)      | 5.9 (5.3-7.2)    | 5.6 (5.2-6.1)*    | 5.3 (4.9-5.9)    | 5.2 (4.9-5.6)*    |
| 2h plasma glucose (mmol/L)           | 6.7 (5.2-12.0)   | 6.1 (4.8-8.0)*    | 6.0 (5.1-8.3)    | 5.7 (4.8-7.0) *   |
| Hemoglobin A1c (mmol/mol)            | 40.0 (36.0-49.0) | 37.0 (34.0-41.0)* | 38.0 (35.0-42.0) | 37.0 (34.0-40.0)* |
| Hemoglobin A1c (%)                   | 5.8 (5.4 -6.6)   | 5.6 (5.3 – 5.9)*  | 5.6 (5.3 – 6.0)  | 5.5 (5.2 – 5.8)*  |

Differences were assessed with a Mann-Whitney test. \*Indicates that groups are not identical. The number of missing values varied for each variable.

Table S2. Socio demographic characteristics, chronic disease and behavioral risk factors of The Maastricht Study participants with a spouse that also participated in the study and participants with a spouse that did not participated in The Maastricht Study, for men and women separately

|                                          | Men                                  |                            | Women                              |                            |
|------------------------------------------|--------------------------------------|----------------------------|------------------------------------|----------------------------|
|                                          | Without spouse information, n= 1,231 | Spouse information, n= 326 | Without spouse information, n= 997 | Spouse information, n= 326 |
|                                          | n (%)                                |                            |                                    |                            |
| <b>Socio demographic characteristics</b> |                                      |                            |                                    |                            |
| Low educational level                    | 823 (71.0)                           | 231 (71.5)                 | 714 (72.2)                         | 216 (67.9)                 |
| <b>Chronic disease background</b>        |                                      |                            |                                    |                            |
| Type 2 diabetes diagnosis                | 486 (39.4)                           | 61 (18.7)*                 | 195 (19.5)                         | 41 (12.5)*                 |
| Hypertension diagnosis                   | 811 (67.0)                           | 220 (68.7)                 | 464 (46.6)                         | 127 (38.9)*                |
| History of CVD                           | 237 (19.4)                           | 53 (16.3)                  | 143 (14.5)                         | 35 (11.0)                  |
| Family history of diabetes               | 219 (31.1)                           | 71 (27.2)                  | 224 (37.0)                         | 77 (30.8)                  |
| <b>Behavioral risk factors</b>           |                                      |                            |                                    |                            |
| High alcohol consumption                 | 288 (23.3)                           | 85 (26.1)                  | 266 (26.7)                         | 103 (32.1)                 |
| Current smokers                          | 168 (13.7)                           | 25 (7.7)*                  | 122 (12.2)                         | 28 (8.7)                   |

\* Indicates that groups are different. Differences assessed with a Chi-square test. The number of missing values varied by variable

Table S3. General characteristics of The Maastricht Study participants comparing spouses with complete data to those with incomplete data stratified by sex

|                                     | Men                            |                                | Women                          |                                |
|-------------------------------------|--------------------------------|--------------------------------|--------------------------------|--------------------------------|
|                                     | Incomplete data<br>n = 154     | Complete data<br>n = 172       | Incomplete data<br>n = 154     | Complete data<br>n = 172       |
|                                     | Median (iqr)                   |                                |                                |                                |
| <b>Socio-demographics</b>           |                                |                                |                                |                                |
| Age                                 | 61.5 (57.0 – 67.0)             | 62.0 (56.0 – 66.0)             | 59.0 (52.2 – 63.0)             | 59.0 (53.7 – 64.0)             |
| <b>Risk factors</b>                 |                                |                                |                                |                                |
| <b>Physical activity dimensions</b> |                                |                                |                                |                                |
| Total wake time (minutes)           | 6,324.3<br>(5,714.5-6,711.7)   | 6,399.0<br>(5,651.0 – 6,685.0) | 6,339.0<br>(5,669.0 – 6,665.0) | 6,244.0<br>(5,594.2 – 6,643.7) |
| Mean stepping minutes/day           | 119.5 (85.3 – 149.9)           | 121.3 (91.2 – 151.8)           | 120.7 (96.9 – 151.1)           | 125.1 (105.1 – 145.4)          |
| Time spent in HPA (%)               | 1.4 (0.7 – 2.8)                | 1.5 (0.7 – 2.9)                | 2.7 (1.6 – 3.7)                | 2.5 (1.4 – 3.7)                |
| Time spent in LPA (%)               | 10.2 (7.4 – 12.9)              | 10.7 (8.2 – 13.1)              | 10.3 (8.1 – 12.4)              | 10.6 (8.8 – 12.1)              |
| <b>Sedentary time (%)</b>           | 63.4 (54.5 – 69.4)             | 62.3 (55.3 – 67.8)             | 54.6 (49.0 – 62.1)             | 55.0 (49.0 – 60.2)             |
| <b>Diet indicators</b>              |                                |                                |                                |                                |
| Dutch Healthy Diet Index            | 79.2 (69.3 – 88.0)             | 81.7 (72.3 – 94.3)             | 88.2 (80.6 – 97.3)             | 90.8 (79.8 – 97.0)             |
| Total energy intake                 | 2,425.4<br>(2,032.2 – 2,820.8) | 2,334.6<br>(1,945.2 – 2,691.2) | 1,932.3<br>(1,651.1 – 2,286.0) | 1,914.5<br>(1,658.3 – 2,296.7) |
| <b>Adiposity measures</b>           |                                |                                |                                |                                |
| BMI                                 | 26.6 (24.5 – 29.3)             | 26.5 (24.4 – 28.7)             | 24.8 (22.9 – 27.7)             | 24.9 (22.4 – 27.3)             |
| Percentage of body fat              | 27.9 (25.0 – 32.6)             | 27.6 (24.3 -31.2)              | 37.8 (34.9 – 40.9)             | 37.9 (34.8 – 41.3)             |
| Waist circumference                 | 100.0 (93.0 – 107.3)           | 98.1 (91.9 – 106.8)            | 85.9 (79.6 – 94.3)             | 87.0 (81.0 – 93.9)             |
| Waist to hip ratio                  | 0.9 (0.9 – 1.0)                | 0.9 (0.9 – 1.0)                | 0.8 (0.8 – 0.9)                | 0.8 (0.8 – 0.9)                |
| <b>Pathophysiological markers</b>   |                                |                                |                                |                                |
| <b>Insulin sensitivity indices</b>  |                                |                                |                                |                                |
| Matsuda index                       | 3.3 (2.0 - 4.7)                | 3.0 (1.9 – 4.7)                | 4.0 (2.7 – 5.8)                | 4.3 (2.6 – 5.7)                |
| HOMA2-IR                            | 1.4 (1.1 – 2.1)                | 1.4 (1.0 – 2.2)                | 1.1 (0.9 – 1.6)                | 1.1 (0.8 – 1.6)                |
| <b>Beta cell function indices</b>   |                                |                                |                                |                                |
| C-peptidogenic index                | 359.5 (209.6 – 558.5)          | 390.4 (250.3 – 562.3)          | 451.3 (275.8 – 708.5)          | 395.8 (262.8 – 724.9)          |

|                                      |                       |                       |                       |                       |
|--------------------------------------|-----------------------|-----------------------|-----------------------|-----------------------|
| Glucose sensitivity index            | 23.4 (16.5 – 33.4)    | 26.9 (18.8 – 38.8)*   | 27.1 (18.3 – 41.5)    | 27.4 (19.2 – 37.3)    |
| C-peptide AUC                        | 178.6 (136.1 – 243.2) | 199.5 (155.4 – 254.8) | 198.1 (159.4 – 263.6) | 195.6 (160.5 – 242.7) |
| Rate sensitivity index               | 216.4 (112.2 – 401.2) | 211.1 (118.9 – 362.0) | 210.1 (137.7 – 400.5) | 207.9 (115.0 – 368.0) |
| Potential factor                     | 1.5 (1.2 – 1.9)       | 1.5 (1.1 – 1.9)       | 1.4 (1.1 – 1.8)       | 1.6 (1.2 – 2.3)*      |
| Disposition index                    | 0.5 (0.4 – 0.8)       | 0.5 (0.3 – 0.8)       | 0.8 (0.5 – 1.2)       | 0.8 (0.5 – 1.1)       |
| <b>Glucose metabolism indicators</b> |                       |                       |                       |                       |
| Fasting plasma glucose (mmol/L)      | 5.6 (5.3 – 6.2)       | 5.6 (5.1 – 6.1)*      | 5.2 (4.8 – 5.6)       | 5.2 (4.9 – 5.6)       |
| 2h plasma glucose (mmol/L)           | 6.2 (4.8 – 8.4)       | 6.1 (4.7 – 7.9)       | 5.8 (4.8 – 7.3)       | 5.7 (4.9 – 6.9)       |
| Hemoglobin A1c (mmol/mol)            | 37.0 (34.0 – 42.0)    | 38.0 (34.0 – 40.0)    | 37.0 (34.0 – 41.0)    | 37.0 (34.0 – 39.0)    |
| Hemoglobin A1c (%)                   | 5.5 (5.3 – 6.0)       | 5.6 (5.3 – 5.8)       | 5.5 (5.3 – 5.9)       | 5.5 (5.2 – 5.7)       |

Differences were assessed with a Mann-Whitney test. \*Indicates that groups are not identical. The number of missing values varied for each variable.

Table S4. Socio demographic characteristics, chronic disease and behavioral risk factors of The Maastricht Study participants comparing spouses with complete data to those with incomplete data stratified by sex

|                                          | Men                        |                          | Women                      |                          |
|------------------------------------------|----------------------------|--------------------------|----------------------------|--------------------------|
|                                          | Incomplete data<br>n = 154 | Complete data<br>n = 172 | Incomplete data<br>n = 154 | Complete data<br>n = 172 |
|                                          | n (%)                      |                          |                            |                          |
| <b>Socio demographic characteristics</b> |                            |                          |                            |                          |
| Low educational level                    | 102 (66.2)                 | 129 (75.0)               | 102 (66.2)                 | 114 (66.2)               |
| <b>Chronic disease background</b>        |                            |                          |                            |                          |
| Type 2 diabetes diagnosis                | 38 (24.6)                  | 23 (13.3)*               | 25 (16.2)                  | 16 (9.3)                 |
| Hypertension diagnosis                   | 114 (74.0)                 | 110 (63.9)               | 63 (40.9)                  | 64 (37.2)                |
| History of CVD                           | 30 (19.4)                  | 23 (13.3)                | 16 (10.3)                  | 19 (11.0)                |
| Family history of diabetes               | 32 (28.3)                  | 39 (26.3)                | 36 (33.6)                  | 41 (28.6)                |
| <b>Behavioural risk factors</b>          |                            |                          |                            |                          |
| High alcohol consumption                 | 50 (32.4)                  | 35 (20.3)*               | 46 (29.8)                  | 57 (33.1)                |
| Current smokers                          | 10 (6.5)                   | 15 (8.7)                 | 14 (9.0)                   | 14 (8.1)                 |

\* Indicates that groups are different. Differences assessed with a Chi-square test. Missing values varied for each variable

Table S5. Quantile regression models for the degree of spousal concordance in pathophysiological markers and type 2 diabetes risk factors

|                                      | Men |                           |                        | Women |                           |                        |
|--------------------------------------|-----|---------------------------|------------------------|-------|---------------------------|------------------------|
|                                      |     | Age adjusted              | Multivariable adjusted |       | Age adjusted              | Multivariable adjusted |
|                                      | n   | beta coefficient (95% CI) |                        | n     | beta coefficient (95% CI) |                        |
| <b>Risk factors</b>                  |     |                           |                        |       |                           |                        |
| <b>Adiposity measures</b>            |     |                           |                        |       |                           |                        |
| BMI                                  | 278 | 0.32 (0.18, 0.34)         | 0.25 (0.19, 0.30)      | 284   | 0.37 (0.19, 0.60)         | 0.38 (0.25, 0.52)      |
| Fat percentage                       | 277 | 0.30 (0.06, 0.52)         | 0.21 (0.08, 0.38)      | 284   | 0.22 (0.11, 0.33)         | 0.22 (0.10, 0.32)      |
| Waist circumference                  | 278 | 0.35 (0.23, 0.47)         | 0.22 (0.08, 0.44)      | 283   | 0.38 (0.19, 0.50)         | 0.33 (0.17, 0.49)      |
| Waist:hip ratio                      | 278 | 0.24 (0.08, 0.38)         | 0.23 (0.02, 0.33)      | 284   | 0.25 (0.12, 0.37)         | 0.22 (0.12, 0.34)      |
| <b>Pathophysiological markers</b>    |     |                           |                        |       |                           |                        |
| Matsuda index                        | 243 | 0.06 (-0.07, 0.11)        | 0.01 (-0.09, 0.08)     | 246   | 0.16 (0.01, 0.34)         | 0.03 (-0.07, 0.22)     |
| HOMA-IR                              | 266 | 0.17 (-0.00, 0.41)        | 0.07 (-0.05, 0.24)     | 275   | 0.10 (0.02, 0.28)         | 0.07 (-0.04, 0.14)     |
| C-peptidogenic index <sub>130</sub>  | 249 | 0.04 (-0.02, 0.12)        | 0.03 (-0.02, 0.12)     | 246   | 0.08 (-0.06, 0.27)        | 0.08 (-0.06, 0.25)     |
| Rate sensitivity index               | 209 | 0.07 (-0.11, 0.33)        | 0.08 (-0.15, 0.39)     | 215   | 0.16 (-0.01, 0.24)        | 0.17 (-0.03, 0.27)     |
| C-peptide AUC                        | 243 | 0.11 (-0.17, 0.28)        | 0.08(-0.06, 0.29)      | 246   | 0.04 (-0.05, 0.30)        | 0.03 (-0.07, 0.31)     |
| Glucose sensitivity index            | 249 | 0.04 (-0.02, 0.25)        | 0.08 (-0.06, 0.18)     | 248   | 0.04 (-0.08, 0.21)        | 0.09 (-0.10, 0.22)     |
| Potential factor                     | 257 | -0.01 (-0.11, 0.10)       | 0.01 (-0.10, 0.07)     | 258   | -0.01 (-0.23, 0.11)       | -0.01 (-0.21, 0.15)    |
| Disposition index                    | 242 | 0.11 (0.02, 0.22)         | 0.11 (-0.01, 0.16)     | 245   | 0.24 (0.10, 0.51)         | 0.13 (0.00, 0.36)      |
| <b>Glucose metabolism indicators</b> |     |                           |                        |       |                           |                        |
| Fasting glucose                      | 287 | 0.24 (0.04, 0.46)         | 0.19 (0.04, 0.40)      | 297   | 0.15 (0.05, 0.27)         | 0.10 (0.01, 0.21)      |
| 2-h plasma glucose                   | 282 | 0.12 (-0.06, 0.30)        | 0.02 (-0.05, 0.13)     | 289   | 0.04 (0.00, 0.16)         | 0.03 (-0.06, 0.14)     |
| HbA1c                                | 285 | 0.15 (-0.03, 0.31)        | 0.08(-0.09, 0.24)      | 295   | 0.09 (-0.04, 0.22)        | 0.08 (0.00, 0.17)      |

Adiposity measures were adjusted for age, self-reported moderate to vigorous physical activity (hours/week), smoking status, Dutch Healthy Diet Index and educational level. Pathophysiological markers and glucose metabolism indicators were adjusted for age, waist circumference, self-reported moderate to vigorous physical activity (hours/week) and family history of diabetes.
